# Supplementary material
Source: publisher figshare collection journal article supplement (https://karger.figshare.com/ndownloader/files/30726008)
Supplement: Supplementary file 1 [file 30726008]

## Sheet: Sheet1
Strain	Full Dataset		Filtered dataset
	Pooled Cells	Mouse level	Pooled Cells	Mouse level
WSB	p<0.0001	0.0409	p<0.0001	1e-04
	1e-04	0.1056	3e-04	p<0.0001
G	p<0.0001	p<0.0001	p<0.0001	p<0.0001
	p<0.0001	0.0012	4e-04	6e-04
LEW	p<0.0001	5e-04	p<0.0001	3e-04
	p<0.0001	0.0013	p<0.0001	0.004
PWD	0.0013	0.0824	0.4811	0.061
	p<0.0001	0.0024	0.0032	0.0121
SKIVE	0.0309	0.277	0.0022	0.0027
	0.0172	0.1411	0.0045	0.0043
KAZ	p<0.0001	p<0.0001	0.053	8e-04
	0.001	p<0.0001	0.1546	p<0.0001
MSM	p<0.0001	0.0382	p<0.0001	p<0.0001
	p<0.0001	0.0043	p<0.0001	p<0.0001
Supplemental Table 1. Results of permutation tests examining the difference between females and males in the within-mouse standard deviation or coefficient of variation in MLH1 focus count. P-values computed based on 10,000 permutations are displayed. Top of cell = p-value for sex difference in standard deviation; bottom of cell = p-value for sex difference in coefficient of variation.
